# Supplementary material
Source: publisher figshare collection journal article supplement (https://tandf.figshare.com/ndownloader/files/20103950)
Supplement: Supplementary file 1 [file 20103950]

| **Supplemental Table 1. Asthma Prevalence in White CCAAPS Participants by NAT1 rs13253389 Genotype, Stratified by Parental Report of SHS Exposure.** | | | | |
| --- | --- | --- | --- | --- |
|  | NAT1 rs13253389 Genotype | | | |
|  | GG | GA | AA | p-value |
| No SHS Exposure | 12.4% | 7.0% | 12.9% | 0.41 |
| SHS Exposure | 10.1% | 18.9% | 44.4% | **0.007** |

| **Supplemental Table 2. Odds ratios and p-values for associations between NAT1 SNPs and asthma in white CCAAPS children overall and stratified by parental report of SHS exposure.** | | | | | | | | |
| --- | --- | --- | --- | --- | --- | --- | --- | --- |
| SNP | Major/ Minor allele | MAF | All | | SHS Exposed | | SHS Unexposed | |
| OR | p-value | OR | p-value | OR | p-value |
| rs7017402 | G/A | 0.123 | 1.84 | 0.0284 | **3.12** | **0.0044** | 0.91 | 0.8160 |
| rs4921580 | C/G | 0.126 | 1.51 | 0.1613 | 2.32 | 0.0661 | 1.20 | 0.6136 |
| rs4921581 | G/A | 0.333 | 1.50 | 0.0550 | **2.80** | **0.0024** | 1.07 | 0.7934 |
| rs13253389 | G/A | 0.344 | 1.48 | 0.0672 | **2.67** | **0.0036** | 1.07 | 0.8072 |
| rs17693103 | G/T | 0.179 | 1.40 | 0.2211 | 2.31 | 0.0321 | 1.12 | 0.7411 |
| rs6586714 | G/A | 0.086 | 0.81 | 0.6261 | 1.54 | 0.4556 | 0.48 | 0.2375 |
| rs4921880 | A/T | 0.227 | 1.82 | 0.0103 | **2.90** | **0.0034** | 1.23 | 0.4739 |
| rs11777998 | G/C | 0.123 | 2.25 | 0.0034 | **3.80** | **0.0008** | 1.08 | 0.8501 |
| rs7003890 | G/A | 0.442 | 1.39 | 0.1412 | 1.57 | 0.1824 | 1.28 | 0.3522 |
| rs8190845 | G/A | 0.126 | 1.32 | 0.3640 | 1.34 | 0.5837 | 1.35 | 0.3973 |
